# Supplementary material
Source: publisher figshare collection journal article supplement (https://acs.figshare.com/ndownloader/files/15455123)
Supplement: Supplementary file 1 [file 15455123]

## Supporting Information

# **Highly Efficient Solar Steam Generation from Activated Carbon Fiber Cloth with Matching Water Supply and Durable Fouling Resistance**

*Qile Fang<sup>a,b,†</sup>, Tiantian Li<sup>a,b,†</sup>, Haibo Lin<sup>a,b</sup>, Rongrong Jiang<sup>a</sup> and Fu Liu<sup>a,b,\*</sup>*

<sup>a</sup>Key laboratory of Marine Materials and Related Technologies, Zhejiang Key Laboratory of Marine Materials and Protective Technologies, Ningbo Institute of Materials Technology & Engineering, Chinese Academy of Sciences, No. 1219 Zhongguan West Rd, Ningbo, 315201, China

<sup>b</sup>University of Chinese Academy of Sciences, 19 A Yuquan Rd, Shijingshan District, Beijing, 100049, China

## **Corresponding Author**

\* E-mail: [fu.liu@nimte.ac.cn](mailto:fu.liu@nimte.ac.cn) (Fu Liu)

## **The SI file includes:**

**Table S1.** The corresponding properties of ACFC

**Figure S1.** SEM image of the cotton fiber non-woven fabrics (CFNF)

**Figure S2.** The relationship of evaporation and water transport rate on the surface of solar steam generation system when ACFC combined with different layers of CFNF.

**Figure S3.** The ion concentrations before and after solar desalination using ACFC+4

**Figure S4.** Mass change of natural water evaporation at experiment condition (without sun illumination)

### **Calculation of solar-steam conversion.**

#### **Heat loss analysis**

**Figure S5.** The surface temperature and its adjacent environment temperature of ACFC+4 under one sun illumination

**Table S2.** Summarization of evaporation rate and conversion efficiency of light-thermal materials

**Figure S6.** Mass change of salt water during a long time illumination (12h) under one sun

**Figure S7.** Conductivity of the bulk water (3.5% NaCl, 80 mL) after salt infiltrating back via ACFC and ACFC+4 during 110 min as shown in Figure 5e, Control: 3.5% NaCl solution, Control+NaCl: 80 mL 3.5% NaCl solution + 0.5 g solid NaCl

Table S1. The corresponding properties of ACFC

| Filament diameter<br>( $\mu\text{m}$ ) | Ignition point<br>( $^{\circ}\text{C}$ ) | Ash content<br>(%) | Bulk density<br>( $\text{g cm}^{-3}$ ) | Specific area<br>( $\text{m}^2 \text{g}^{-1}$ ) | Pore volume<br>( $\text{cm}^3 \text{g}^{-1}$ ) | Pore size distribution (%) |        |        |       |
|----------------------------------------|------------------------------------------|--------------------|----------------------------------------|-------------------------------------------------|------------------------------------------------|----------------------------|--------|--------|-------|
|                                        |                                          |                    |                                        |                                                 |                                                | <1 nm                      | 1-2 nm | 2-5 nm | >5 nm |
| 10~20                                  | > 500                                    | 2~3                | 0.04~0.1                               | 800~1800                                        | 0.9~1.28                                       | 83~84                      | 6~7    | 6~7    | 4~5   |

\*The data was provided by the supplier of ACFC

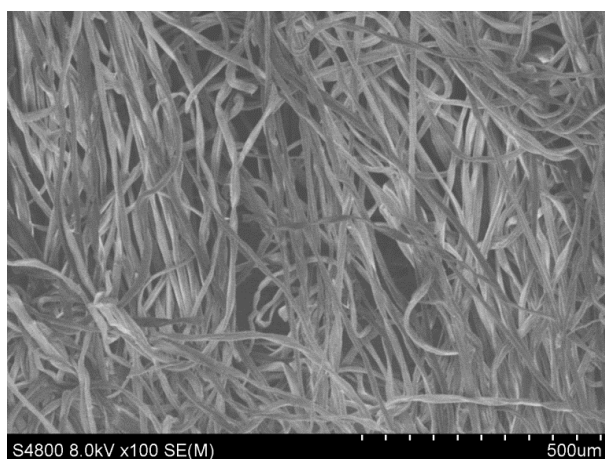

**Figure S1.** SEM image of the cotton fiber non-woven fabrics (CFNF)

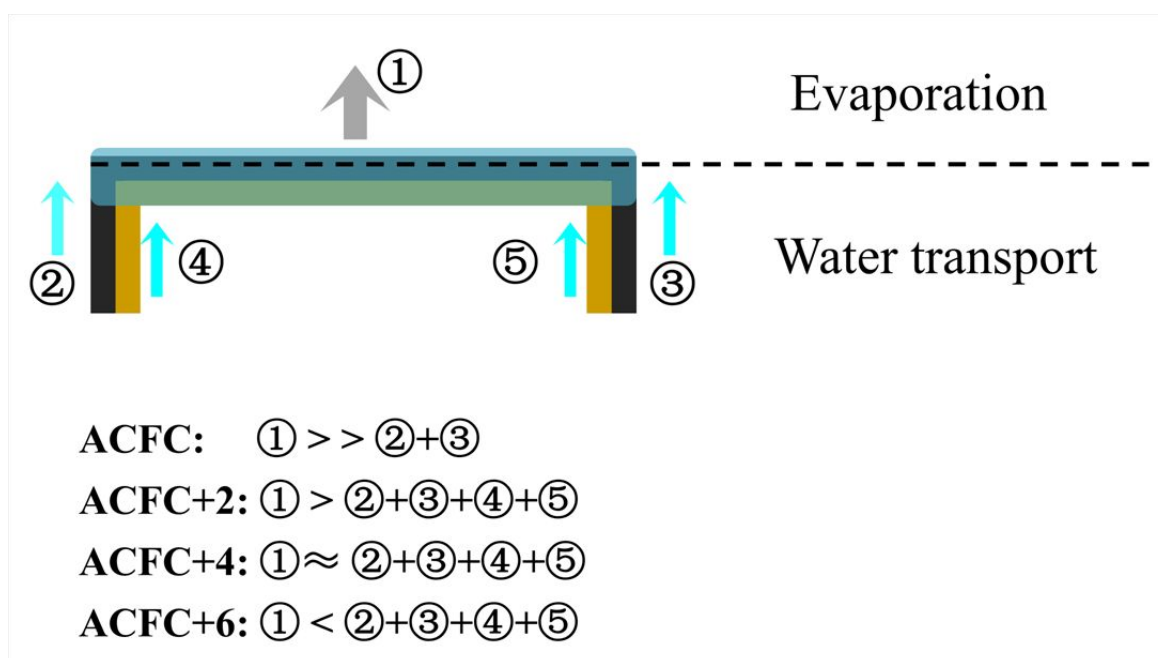

**Figure S2.** The relationship of evaporation and water transport rate on the surface of solar steam generation system when ACFC combined with different layers of CFNF.

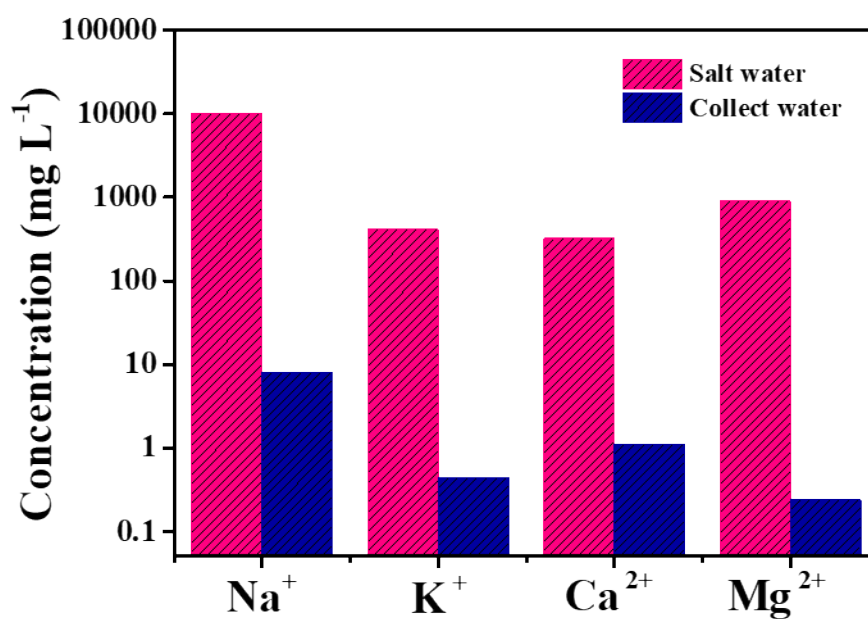

**Figure S3.** The ion concentrations before and after solar desalination using AFCF+4

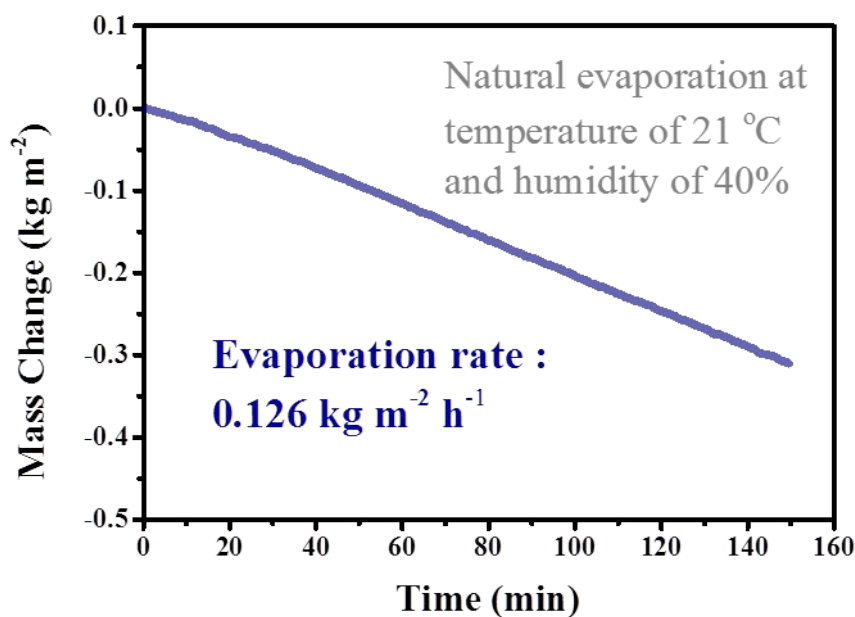

**Figure S4.** Mass change of natural water evaporation at experiment condition (without sun illumination)

#### Calculation of solar-steam conversion.

The conversion efficiency is calculated by

$$\eta = m h_{lv} / P_{in}$$

where  $\eta$  is solar-steam conversion efficiency,  $m$  is the mass flux of steam,  $h_{lv}$  denotes the total enthalpy, including the liquid-vapor phase change enthalpy (2260 J g<sup>-1</sup>) and the sensible heat, and  $P_{in}$  is the solar illumination energy. The natural evaporation of pure water without sun illumination (0.126 kg m<sup>-2</sup> h<sup>-1</sup>, Figure S3) has been considered and subtracted from all the measured evaporation rates to calculate the conversion efficiency.

## Heat loss analysis

In the interfacial solar steam generation system, the localized thermal energy at ACFC surface via light-thermal conversion is divided into four parts: evaporation, radiation, convection, and conduction, and the latter three constitute the heat loss of the system. The detailed calculation of heat loss is illustrated below.

### Radiation

Stefan-Boltzmann equation is used to calculate the radiation loss

$$\Phi = A\varepsilon\sigma(T_1^4 - T_2^4) \quad \text{Equation S1}$$

where  $\Phi$  is the heat flux,  $A$  the surface area of the absorber used in the system ( $2 \text{ cm} \times 2.5 \text{ cm}$ ),  $\varepsilon$  the emittance of the absorbing surface (0.97),  $\sigma$  the Stefan-Boltzmann constant ( $5.6703 \times 10^{-8} \text{ W m}^{-2} \text{ K}^{-4}$ ),  $T_1$  is the surface temperature of ACFC under one sun illumination ( $31.6^\circ \text{C}$ ),  $T_2$  is the adjacent environment temperature ( $28^\circ \text{C}$ ). The radiative heat loss is  $22.0 \text{ W m}^{-2}$ .

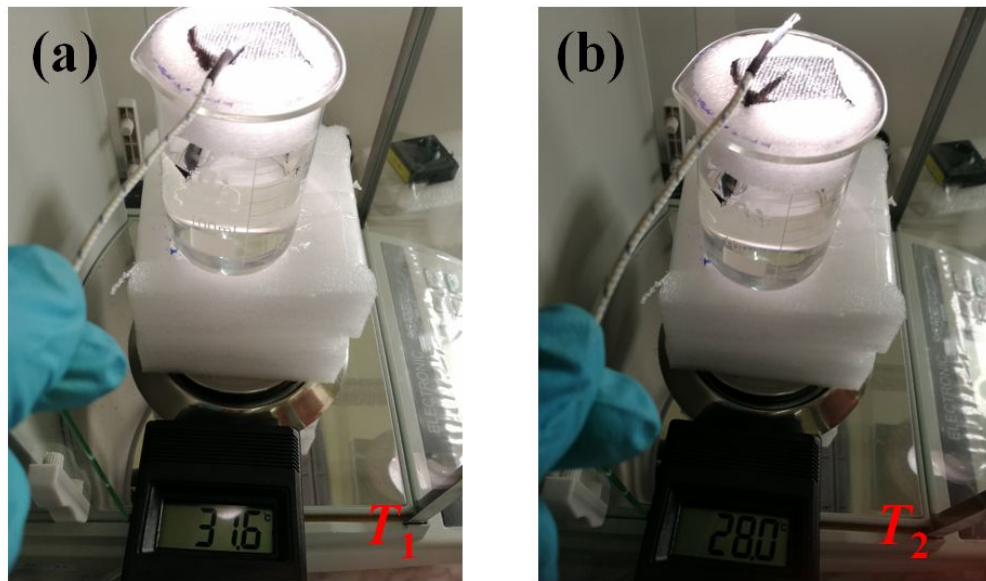

**Figure S5.** The surface temperature and its adjacent environment temperature of ACFC+4 under one sun illumination

## Convection

Equation S2 based on Newton' law of cooling is used to calculate the convection of heat loss

$$Q=Ah(T_1-T_2) \quad \text{Equation S2}$$

where  $Q$  is the heat flux,  $A$  the surface area of the absorber used in the system (2 cm × 2.5 cm),  $h$  the natural convection heat transfer coefficient (10 W m<sup>-2</sup> K<sup>-1</sup>) (*Nat. Energy*, **2016**, 1, 126),  $T_1$  is the surface temperature of ACFC under one sun illumination (31.6 °C),  $T_2$  is the adjacent environment temperature (28 °C). The convective heat loss is 36.0 W m<sup>-2</sup>.

## Conduction

Although PS foam and air gap are set as thermal insulation layer in the interfacial solar steam generation system, a portion thermal loss conducted to bulk water might occur via the side water path of ACFC. Equation S3 is used to calculate the heat loss of conduction

$$Q=Cm\Delta T \quad \text{Equation S3}$$

where  $Q$  is the heat flux,  $C$  the specific heat capacity of water (4.2 kJ °C<sup>-1</sup> kg<sup>-1</sup>),  $m$  the bulk water weight used in the experiment (80 g),  $\Delta T$  the temperature change of the bulk water with insulation installation after evaporation within 1h (0.05 °C, the sensitivity of thermoelectric thermometer is 0.1°C, and there were no dection of temperature change within 1h, but 0.1 °C increase after 2h). The conduction heat loss is 9.3 W m<sup>-2</sup>.

Therefore, the total heat loss is 67.3 W m<sup>-2</sup>, 6.7% to the input solar energy.

**Table S2.** Summarization of evaporation rate and conversion efficiency of light-thermal materials

| Light-thermal materials                                     | Optical concentration | Evaporation rate (kg m <sup>-2</sup> h <sup>-1</sup> ) | Efficiency (%) | References |
|-------------------------------------------------------------|-----------------------|--------------------------------------------------------|----------------|------------|
| Graphene oxide film with 2D water path                      | 1                     | 1.45                                                   | 80             | [3]        |
| Thin-film black gold membrane                               | 1                     | 0.67                                                   | 47             | [4]        |
| Al nanoparticles -3D porous membrane                        | 4                     | 5.7                                                    | 88.4           | [6]        |
| Black amorphous Al-Ti-O nanostructure                       | 1                     | 1.03                                                   | 64.46          | [7]        |
| TiAlON-based nanocomposite with A 1D water supply channel   | 1                     | 1.13                                                   | 73             | [15]       |
| N-doping 3D porous graphene                                 | 1                     | 1.5                                                    | 80             | [20]       |
| Bilayer wood with a carbonized surface                      | 1                     | ~1                                                     | 57.3           | [21]       |
| Carbonized mushrooms                                        | 1                     | 1.475                                                  | 78             | [22]       |
| 3D printing all-in-one evaporator with GO/CNT/NFC           | 1                     | 1.25                                                   | 85.6           | [24]       |
| Flexible wood/CNTs membrane                                 | 1                     | 0.95                                                   | 65             | [25]       |
|                                                             | 3                     | 2.88                                                   | 67             |            |
|                                                             | 5                     | 5.14                                                   | 72             |            |
| Narrow-bandgap Ti <sub>2</sub> O <sub>3</sub> nanoparticles | 1                     | 1.32                                                   |                | [26]       |
|                                                             | 5                     | 5.03                                                   |                |            |
| Graphene oxide-based evaporator with 1D water path          | 1                     | 1.27                                                   | 87.5           | [27]       |
| Functionalized graphene with hydrophilic groups             | 1                     | 0.47                                                   | 48             | [37]       |
| GO-SA-CNT aerogels                                          | 1                     | 1.622                                                  | 83             | [38]       |
| Black titania with unique nanocage structure                | 1                     | 1.13                                                   | 70             | [39]       |
| Black TiO <sub>x</sub> nanoparticles                        | 1                     | 0.8012                                                 | 50.3           | [40]       |
| Narrow-bandgap Ti <sub>2</sub> O <sub>3</sub> nanoparticles | 1                     | 1.32                                                   |                | [41]       |
|                                                             | 5                     | 5.03                                                   |                |            |
| Monolithic polymer foam                                     | 1                     | 1.1687                                                 | 80.5           | [42]       |
| Non-stoichiometric MoO <sub>3-x</sub> quantum dots          | 5                     | 4.95                                                   | 62             | [43]       |
| CNT modified filter paper                                   | 1                     | 1.1                                                    | 73             | [44]       |
| Polydopamine-filled bacterial nanocellulose                 | 1                     | 1.13                                                   | 78             | [45]       |
|                                                             | 3                     | 3.47                                                   | 82             |            |
| Coke-derived carbons                                        | 2                     | 1.85                                                   | 62.8           | [46]       |
| Fe <sub>3</sub> O <sub>4</sub> @C film                      | 1                     | 1.03                                                   |                | [47]       |
| ACFC+CFNF                                                   | 1                     | 1.59                                                   | 91.8           | This work  |
|                                                             | 2                     | 2.80                                                   | 83.7           |            |
|                                                             | 3                     | 3.99                                                   | 80.5           |            |
|                                                             | 4                     | 5.58                                                   | 86.2           |            |
|                                                             | 5                     | 7.29                                                   | 89.0           |            |



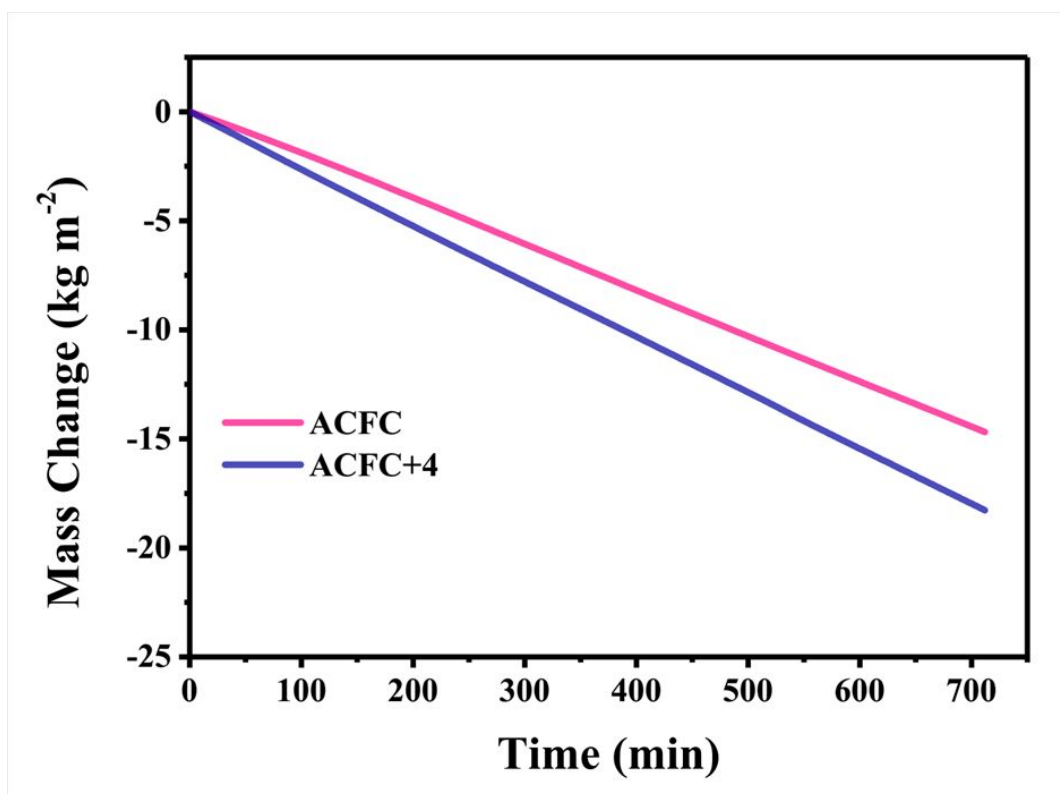

**Figure S6.** Mass change of salt water during a long time illumination (12h) at one sun

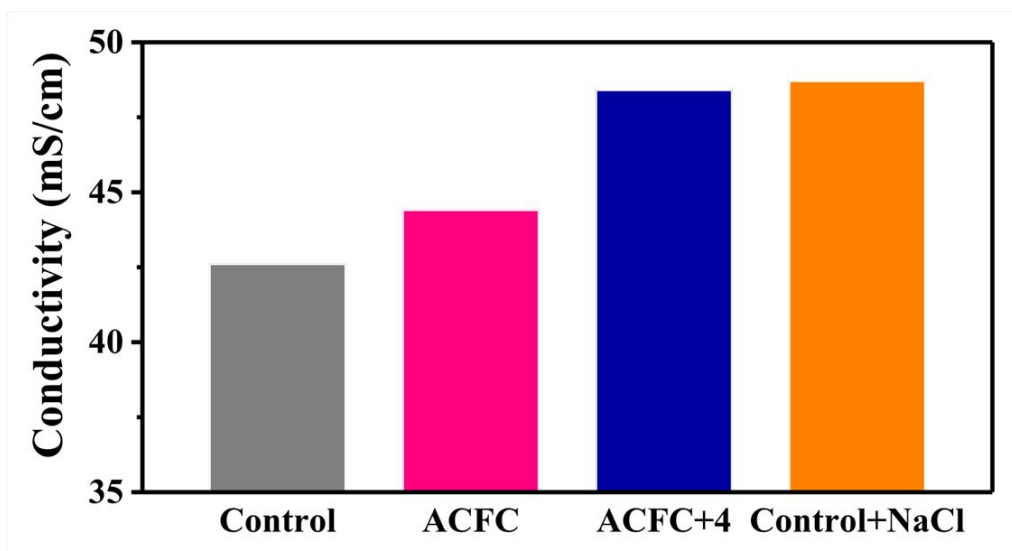

**Figure S7.** Conductivity of the bulk water (3.5% NaCl, 80 mL) after salt infiltrating back via ACFC and ACFC+4 during 110 min as shown in Figure 5e, Control: 3.5% NaCl solution, Control+NaCl: 80 mL 3.5% NaCl solution + 0.5 g solid NaCl.
